# Supplementary material
Source: PubMed Central journal article supplement (PMC3716176)
Supplement: AAC.02155-12_zac999101819so1.pdf [file AAC.02155-12_zac999101819so1.pdf]

**Table S1.** Comparison of ORFs encoded by the pHN1122-1 with pFRIK2000, pSH146\_65, pCHi7122-3, R721 and R64 backbones.

| Gene name <sup>a</sup> | Nucleotide position | Function encoded                               | Percentage amino acid identity (query coverage) <sup>b</sup> |            |            |            |            |
|------------------------|---------------------|------------------------------------------------|--------------------------------------------------------------|------------|------------|------------|------------|
|                        |                     |                                                | pFRIK2000                                                    | pSH146_65  | pCHi7122-3 | R721       | R64        |
| <i>hyp</i>             | 413-54              | hypothetical protein                           | –                                                            | –          | 95.8(119)  | –          | –          |
| <i>repA</i>            | 508-1524            | replication initiation protein                 | 97.04(338)                                                   | 99.7(338)  | 97.34(338) | 99.7(338)  | 74.17(333) |
| <i>hyp</i>             | 2002-1622           | hypothetical protein                           | –                                                            | 95.83(72)  | 89.72(107) | –          | –          |
| <i>yaeA (mok)</i>      | 2798-3085           | modulator of post-segregation killing protein  | 97.18(71)                                                    | 95.77(71)  | 83.16(95)  | 95.77(71)  | –          |
| <i>yaeB (hok)</i>      | 2928-3089           | post-segregation killing protein               | 11(53)                                                       | 98.1(53)   | 83.0(53)   | 98.11(53)  | 39.13(46)  |
| <i>yaeC (finO)</i>     | 3262-3834           | conjugal transfer fertility inhibition protein | 99.47(190)                                                   | 100(190)   | 100(190)   | 100(190)   | 35.42(192) |
| <i>yafA</i>            | 4136-3852           | stability/ partitioning determinant            | 100(94)                                                      | 100(94)    | 100(94)    | 100(94)    | –          |
| <i>yafB (parA)</i>     | 4875-4210           | plasmid partition protein                      | 99.55(221)                                                   | 99.1(221)  | 99.1(221)  | 99.1(221)  | 24.53(212) |
| <i>yagA</i>            | 5461-5790           | hypothetical protein                           | 98.17(109)                                                   | 100(109)   | 98.17(109) | 98.17(109) | –          |
| <i>dnaJ</i>            | 6322-6708           | DnaJ-class molecular chaperone                 | 100(128)                                                     | 99.22(128) | –          | –          | –          |
| <i>hyp</i>             | 6812-7354           | hypothetical protein                           | 100(180)                                                     | 99.36(156) | –          | –          | –          |
| <i>hyp</i>             | 11843-12217         | hypothetical protein                           | 99.19(124)                                                   | –          | –          | –          | –          |
| <i>yceB</i>            | 13390-12947         | hypothetical protein                           | 100(147)                                                     | 97.28(147) | 70.75(147) | 70.75(147) | –          |
| <i>ycfA</i>            | 13687-13869         | hypothetical protein                           | 100(60)                                                      | 100(60)    | 100(60)    | 100(60)    | –          |
| <i>ycfB</i>            | 13894-14331         | hypothetical protein                           | 100(145)                                                     | 100(145)   | 100(145)   | 100(145)   | –          |
| <i>hyp</i>             | 14782-14462         | hypothetical protein                           | 100(106)                                                     | 98.11(106) | 96.3(108)  | 93.18(44)  | 62.07(58)  |
| <i>hyp</i>             | 15294-14779         | hypothetical protein                           | 100(171)                                                     | 97.66(171) | –          | –          | –          |

|             |             |                                                              |                |            |                           |                           |            |
|-------------|-------------|--------------------------------------------------------------|----------------|------------|---------------------------|---------------------------|------------|
| <i>ycgB</i> | 16015-15596 | hypothetical protein                                         | 97.12(139)     | 89.62(106) | 90.91(44)                 | 90.38(104)                | –          |
| <i>hyp</i>  | 16742-16035 | hypothetical protein                                         | 100(235)       | 98.56(139) | 67.15(137)                | 67.15(137)                | –          |
| <i>traL</i> | 17496-16744 | conjugal transfer protein                                    | 100(250)       | 100(250)   | –                         | –                         | –          |
| <i>hyp</i>  | 17915-17514 | hypothetical protein                                         | 100(133)       | 98.04(102) | –                         | –                         | –          |
| <i>nikA</i> | 18284-18625 | relaxosome component                                         | 100(113)       | 100(113)   | 90.27(113)                | 100(113)                  | –          |
| <i>nikB</i> | 18622-22827 | relaxase                                                     | 97.53(1419)    | 99.01(809) | 90.48(809),<br>84.32(338) | 82.61(345),<br>47.81(297) | –          |
| <i>nikC</i> | 19601-19900 | relaxosome accessory protein                                 | 100(99)        | 99.0(99)   | 100(99)                   | 100(99)                   | –          |
| <i>yddA</i> | 23310-22870 | hypothetical protein                                         | 98.63(146)     | 96.58(146) | 95.21(146)                | 93.15(146)                | –          |
| <i>hyp</i>  | 23986-23555 | hypothetical protein                                         | 99.3(143)      | –          | –                         | –                         | –          |
| <i>ydfA</i> | 24338-24132 | transcriptional regulator                                    | 100(68)        | 97.06(68)  | 86.67(30)                 | 97.06(68)                 | –          |
| <i>ydfB</i> | 24777-24457 | hypothetical protein                                         | –              | 80.17(116) | –                         | 80.17(116)                | –          |
| <i>ydfC</i> | 25026-24802 | hypothetical protein                                         | –              | 100(74)    | –                         | 100(74)                   | –          |
| <i>ydgA</i> | 27408-25252 | DNA topoisomerase III, may<br>play a role in DNA segregation | 100(718)       | 95.4(718)  | 95.51(713)                | 99.72(718)                | –          |
| <i>hyp</i>  | 28007-27420 | hypothetical protein                                         | –              | –          | 97.18(195)                | –                         | –          |
| <i>hyp</i>  | 28775-28371 | hypothetical protein                                         | –              | –          | 99.25(134)                | –                         | –          |
| <i>yeaA</i> | 29309-28791 | hypothetical protein                                         | 98.25(171)     | 97.66(171) | 92.96(71)                 | 96.49(171)                | –          |
| <i>yebA</i> | 30009-29356 | hypothetical protein                                         | 98.16(217)     | 99.08(217) | 98.62(217)                | 98.16(217)                | –          |
| <i>rci</i>  | 31145-30021 | shufflon-specific<br>recombinase                             | DNA 99.47(374) | 99.2(374)  | 99.47(374)                | 99.47(374)                | 76.14(373) |
| <i>hyp</i>  | 31656-32138 | hypothetical protein                                         | –              | –          | 100(117)                  | –                         | 82.91(117) |
| <i>pilV</i> | 33379-32135 | plasmid conjugative transfer<br>pilus-tip adhesin protein    | 100(341)       | 95.89(365) | 96.16(365)                | 99.71(347)                | 50.68(367) |

|                      |             |                                                           |            |            |            |            |            |
|----------------------|-------------|-----------------------------------------------------------|------------|------------|------------|------------|------------|
| <i>pilU</i>          | 34027-33392 | prepilin peptidase                                        | 100(211)   | 98.1(211)  | 100(211)   | 100(211)   | 27.06(170) |
| <i>pilT</i>          | 34513-34031 | type IV secretion system pilus<br>Lytic transglycosylase  | 100(160)   | 100(160)   | 100(160)   | 100(160)   | 59.4(133)  |
| <i>pilS</i>          | 35047-34580 | type IV leader peptidase family<br>protein                | 100(155)   | 92.26(155) | 90.32(155) | 92.26(155) | 29.3(157)  |
| <i>pilR</i>          | 35047-34580 | type IV pilus transmembrane<br>protein                    | 100(369)   | 99.19(369) | 98.92(369) | 99.19(369) | 25.63(359) |
| <i>pilQ</i>          | 37820-36282 | plasmid conjugative transfer<br>ATPase                    | 99.61(512) | 99.8(512)  | 99.8(512)  | 98.26(517) | 41.62(507) |
| <i>pilP</i>          | 38339-37845 | type IV pilus biogenesis<br>periplasmic protein precursor | 100(164)   | 98.78(164) | 98.78(164) | 98.17(164) | 30.33(122) |
| <i>pilO</i>          | 39633-38323 | type IV pilus biogenesis outer<br>membrane protein        | 99.77(436) | 99.54(436) | 99.54(436) | 99.31(436) | 22.47(365) |
| <i>pilN</i>          | 41327-39684 | type IV pilus outer membrane<br>secretin lipoprotein      | 99.82(547) | 99.63(547) | 99.63(547) | 99.63(547) | 39.42(553) |
| <i>yfdA</i>          | 41838-41320 | hypothetical protein                                      | 84.09(176) | 90.91(176) |            | 94.77(172) |            |
| <i>traK (virD4)</i>  | 43843-41885 | conjugal transfer protein                                 | 100(652)   | 98.16(652) | 98.37(613) | 99.85(652) |            |
| <i>traJ (virB11)</i> | 44914-43859 | conjugal transfer protein                                 | 100(326)   | 100(351)   | 100(351)   | 100(351)   | 32.31(130) |
| <i>traI (virB10)</i> | 46072-44933 | conjugal transfer protein                                 | 99.47(379) | 99.21(379) | 99.21(379) | 99.47(379) | –          |
| <i>traH (virB9)</i>  | 46832-46062 | conjugal transfer outer membrane<br>protein precursor     | 99.61(256) | 99.57(233) | 99.22(256) | 99.61(256) | –          |
| <i>traG (virB8)</i>  | 47563-46829 | conjugal transfer protein                                 | 99.59(244) | 100(244)   | 99.59(244) | 99.59(244) | –          |
| <i>traE (virB4)</i>  | 50084-47727 | conjugal transfer protein                                 | 99.75(785) | 99.49(785) | 97.2(785)  | 99.45(785) | –          |

|                              |             |                                                           |            |            |             |            |            |
|------------------------------|-------------|-----------------------------------------------------------|------------|------------|-------------|------------|------------|
| <i>traD</i> ( <i>virB3</i> ) | 50410-50090 | conjugal transfer protein                                 | 99.06(106) | 99.06(106) | 99.06(106)  | 95.28(106) | –          |
| <i>traC</i> ( <i>virB2</i> ) | 50771-50481 | conjugal transfer prepropilin                             | 100(96)    | 100(96)    | 96.88(96)   | 96.88(96)  | –          |
| <i>traB</i> ( <i>virB1</i> ) | 51355-50771 | conjugal transfer protein                                 | 97.93(193) | 98.45(194) | 97.93(193)  | 98.45(193) | –          |
| <i>ygeA</i>                  | 51774-51376 | hypothetical protein                                      | 99.24(132) | 98.48(132) | 99.24(132)  | 99.24(132) | –          |
| <i>pilM</i>                  | 52551-52114 | type IV pilus biogenesis protein                          | 97.24(145) | 95.17(145) | 95.17(145)  | 95.17(145) | 27.03(148) |
| <i>pilL</i>                  | 53792-52557 | type IV pilus biogenesis outer membrane protein precursor | 97.08(411) | 97.08(411) | 97.57(411)  | 97.08(411) | 29.61(233) |
| <i>yggA</i>                  | 54094-53795 | hypothetical protein                                      | 100(99)    | 98.99(99)  | 97.89(95)   | 93.94(99)  | –          |
| <i>yggB</i>                  | 54793-54161 | hypothetical protein                                      | 98.58(211) | 98.1(211)  | 98.58(211)  | 97.63(211) | –          |
| <i>ygiA</i>                  | 54841-55650 | possible DNA primas                                       | 98.14(269) | 91.23(114) | –           | 99.26(269) | –          |
| <i>ygiB</i>                  | 55933-55697 | hypothetical protein                                      | 51.67(60)  | 100(78)    | 80.26(76)   | 39.71(68)  | –          |
| <i>trbJ</i> ( <i>virB5</i> ) | 56584-55937 | conjugal transfer protein                                 | 90.16(193) | 99.53(215) | 87.68(203 ) | 84.04(213) | –          |
| <i>trbL</i> ( <i>virB6</i> ) | 57576-56590 | plasmid conjugal transfer protein                         | 67.76(335) | 98.78(328) | 68.06(335)  | 68.66(335) | –          |
| <i>yhaB</i>                  | 58136-57834 | hypothetical protein                                      | 99(100)    | 100(100)   | 100(100)    | 95.35(86)  | –          |
| <i>yhbB</i>                  | 59213-58551 | hypothetical protein                                      | 99.09(220) | 52.27(88)  | 53.41(88)   | 95.45(220) | –          |
| <i>yhcA</i>                  | 59841-59398 | hypothetical protein                                      | 100(147)   | 94.56(147) | 96.6(147)   | 91.84(147) | –          |
| <i>yhdA</i>                  | 60891-59914 | hypothetical protein                                      | 100(325)   | 99.69(325) | 99.69(325)  | 97.85(325) | –          |
| <i>yheC</i>                  | 61552-61100 | putative protease                                         | 98.08(104) | 98.08(104) | 99.33(150)  | 99.33(150) | –          |

<sup>a</sup> Genes and proteins in the pHN1122-1 backbone were annotated by reference to R721 (GenBank accession no. AP002527) and by BLASTp searches, hyp presents genes encoding putative proteins. Genes used for phylogenetic analysis are shaded.

<sup>b</sup> Amino acid identify was measured for each ORF of pHN1122-1 versus the respective ORFs of pFRIK2000 (NZ\_ACXO01000104), pSH146\_65 (JN983044), pChi7122-3 (FR851304), R721 (AP002527) and R64 (AP005147).

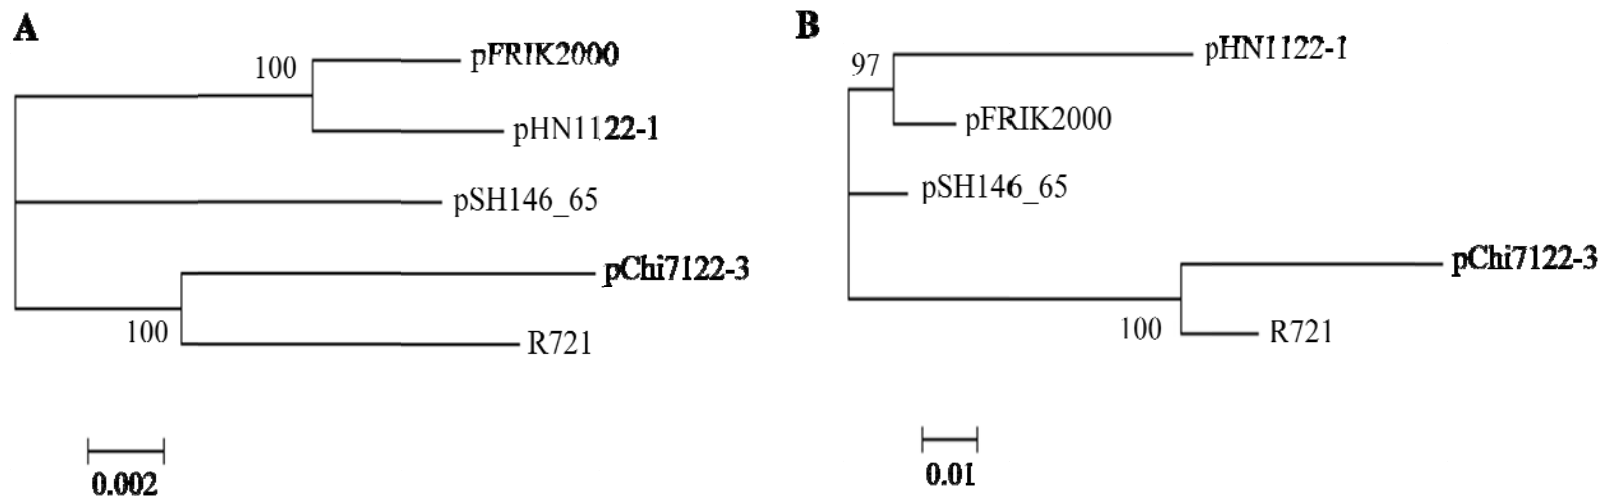

**Figure S1.** Phylogenetic alignment of 5 IncI2 plasmids. (A) The phylogeny was constructed in MEGA5 using the Neighbor-joining method from concatenated sequences of genes shared by all five IncI2 plasmids (Table S1). Bootstrap consensus trees were inferred using 500 replicates, with numbers at nodes representing percent correspondence. The scale bars represent the number of base substitutions per site. Sequences were obtained from the following GenBank accession nos.: R721, AP002527; pSH146\_65, JN983044; pChi7122-3, FR851304; pFRIK2000, NZ\_ACXO01000104; pHN1122-1, JN797501). (B) The phylogeny was constructed in MEGA5 using the Maximum Likelihood method from the entire sequences of the five IncI2 plasmids after removing any mobile elements. Bootstrap consensus trees were inferred using 500 replicates.
